# Supplementary material for: Context-aware resource allocation for cellular wireless networks
Source: Springer Nature journal article supplement (doi:10.1186/1687-1499-2012-216), 2012-07-12

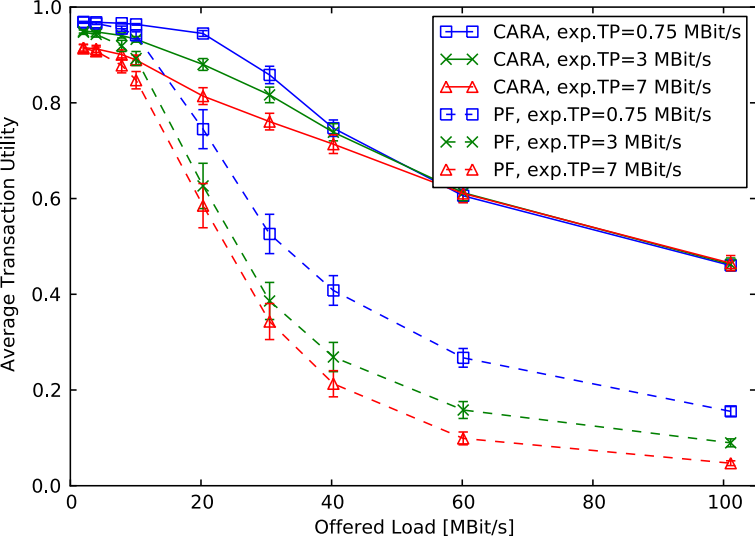

Supplement: 13638_2011_497_MOESM8_ESM.pdf [file 13638_2011_497_MOESM8_ESM.pdf]
